# Supplementary material for: Signaling via the p75 neurotrophin receptor facilitates amyloid-β-induced dendritic spine pathology
Source: PubMed Central journal article supplement (PMC7415136; doi:10.1038/s41598-020-70153-4), 2020-08-07
Supplement: 41598_2020_70153_MOESM1_ESM.pdf [file 41598_2020_70153_MOESM1_ESM.pdf]

Supplementary Material for:

**Signaling via the p75 neurotrophin receptor facilitates amyloid- $\beta$ -induced dendritic spine pathology**

Abhisarika Patnaik<sup>1</sup>, Marta Zagrebelsky<sup>1</sup>, Martin Korte<sup>1,2</sup> and Andreas Holz<sup>2\*</sup>

**Affiliations:**

<sup>1</sup> Zoological Institute, Division of Cellular Neurobiology, TU Braunschweig, Braunschweig, D-38108, Germany

<sup>2</sup> Helmholtz Centre for Infection Research, AG NIND, Inhoffenstr. 7, Braunschweig, D-38124, Germany.

**\* Corresponding author:**

Andreas Holz, PhD  
Group Neuroinflammation and Neurodegeneration  
Helmholtz Centre for Infection Research  
Inhoffenstrasse 7, D-38124 Braunschweig, Germany

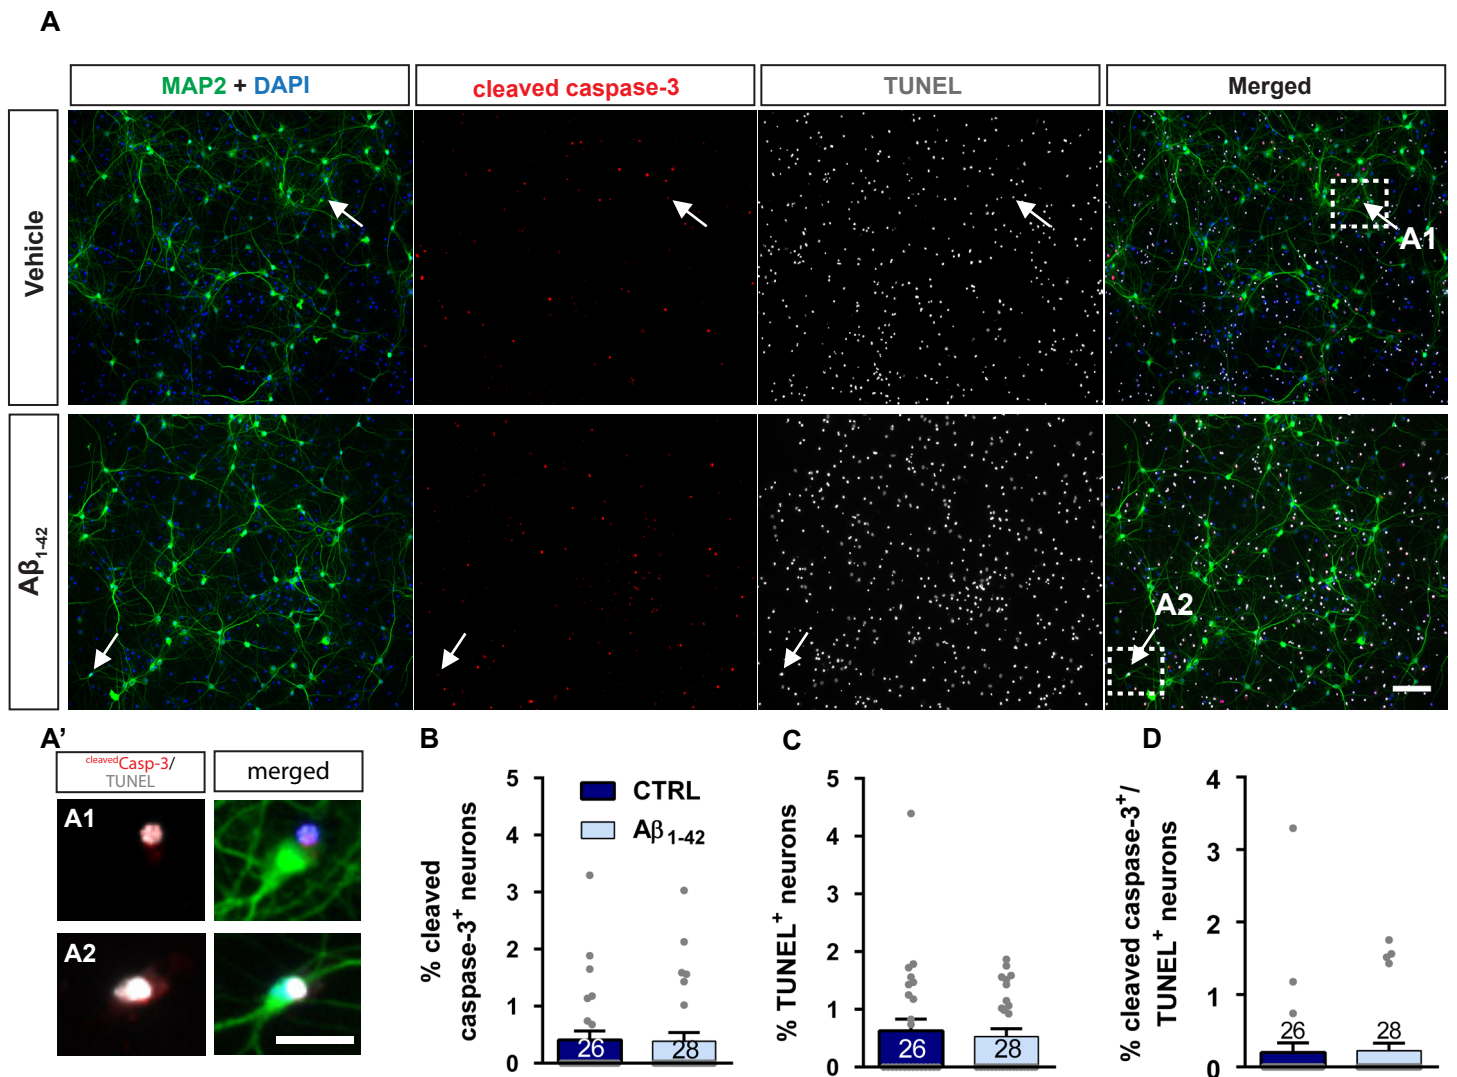

Figure S1: Patnaik et al

**Treatment of neuronal cultures with 500 nM amyloid-β oligomers has no significant effect on the number of activated Caspase-3 and TUNEL-positive hippocampal neurons**

(A) Shows representative images of primary hippocampal cultures from wild type mice treated for 6 hours with vehicle (top panels) or 500nM Aβ<sub>1-42</sub> oligomers (bottom panels) and stained for MAP2 (green), cleaved caspase-3 (red) or TUNEL (white). Arrows indicate MAP2 positive neurons also positive both for cleaved caspase-3 and TUNEL as see in the merged image on the right. Scale bar is 100μm. (A') shows two close ups of MAP2 positive neurons, also positive for both activated caspase-3 and TUNEL in cultures treated with vehicle (above) or 500 nM Aβ<sub>1-42</sub> oligomers (below, scale bar is 20 μm). The graphs show the proportion in % of cleaved caspase-3- (B), TUNEL- (C) or both cleaved caspase-3 and TUNEL-positive neurons (D) for cultures treated with vehicle (dark blue) or 500 nM Aβ<sub>1-42</sub> oligomers (light blue). The numbers on top of the bars in the graphs indicate the number of fields of views used for the analysis. The bars reflect mean values + SEM. Statistical significance was tested using a Student's t-test. Note that while in the images many non-neuronal cells are positive for activated caspase-3 and TUNEL, the number of dying neurons is extremely low and not significantly different between the two conditions.

15 min exposure of  $A\beta_{1-42}$  to hippocampal neuronal cultures

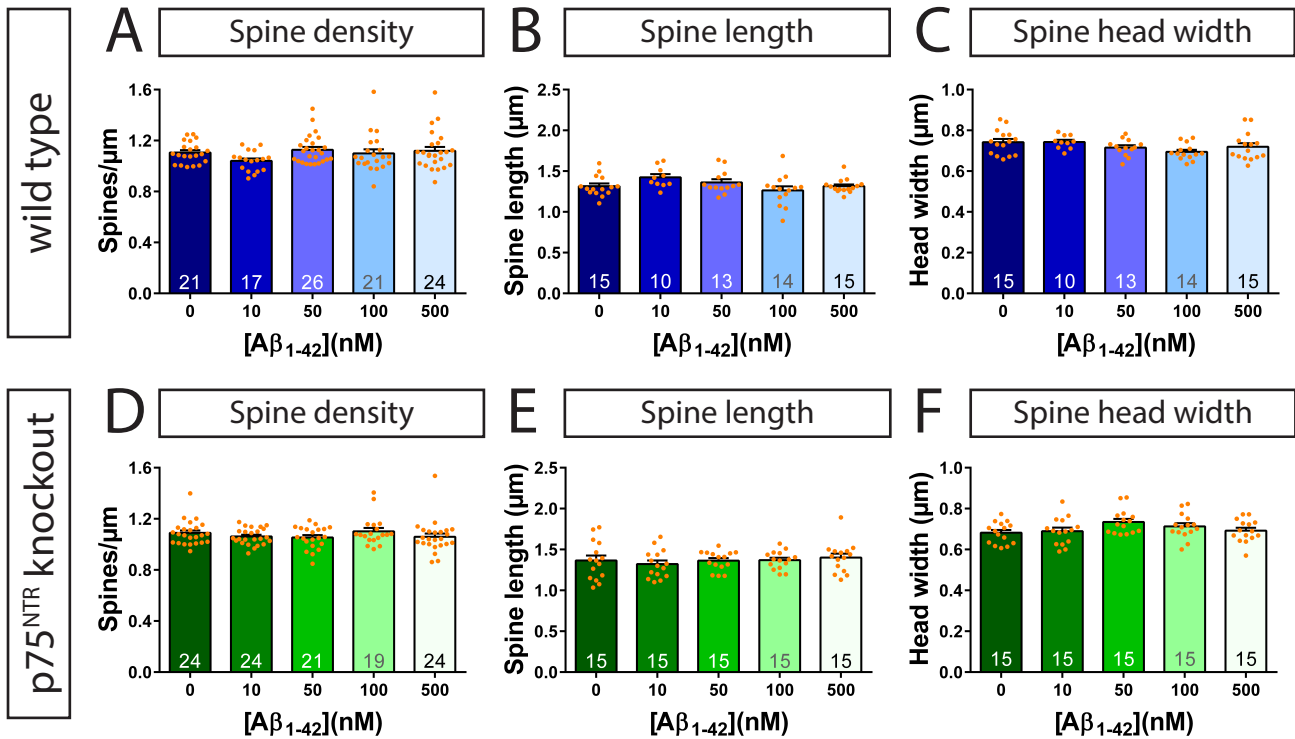

Figure S2: Patnaik et al

**Brief treatment of neuronal cultures with amyloid- $\beta$  oligomers has no impact on dendritic spine density and morphology**

Primary hippocampal neurons from wild type (A-C) and p75<sup>NTR</sup> ko (D-F) mice either were incubated with vehicle (0) or were treated for 15 minutes with 10, 50, 100, or 500 nM aggregated  $A\beta_{1-42}$  peptides. Spine density (A, D), spine length (B, E), and spine head width (C, F) were determined by analyzing dendritic segments (each with a length of at least 100  $\mu\text{m}$ ). Bars reflect mean values + SEM. Number of evaluated neurons from three independent experiments is printed for each column of the graph. To test for statistical significance a One-way ANOVA with Sidak post-test was employed. Note that comparing the means of the analyzed spine parameters of amyloid- $\beta$ -treated to their corresponding vehicle control groups never revealed any statistical significance.
